# Supplementary material for: Recasting Ni-foam into NiF2 nanorod arrays via a hydrothermal process for hydrogen evolution reaction application
Source: Royal Society of Chemistry journal article supplement (doi:10.1039/d1dt00654a), 2021-01-01
Supplement: d1dt00654a1.pdf [file d1dt00654a1.pdf]

## Supporting Information (S)

### **Scarify Ni-foam into nanocrystal growth of NiF<sub>2</sub> Nanorod-Arrays using hydrothermal process for Hydrogen Evolution Reaction Application**

Nanasaheb M. Shinde<sup>a</sup> Siddheshwar D. Raut<sup>b</sup>, Balaji G. Ghule<sup>b</sup>, Krishna C. Gunturu <sup>c</sup>, James J. Pak<sup>a\*</sup> and Rajaram S. Mane<sup>b\*</sup>

*<sup>a</sup> School of Electrical and Engineering, Korea University, Seoul, 02841, Republic of Korea.*

*<sup>b</sup> School of Physical Sciences, S. R. T. M. University, Nanded-431501, (MS) India*

*<sup>c</sup> School of Chemical Sciences, S. R. T. M. University, Nanded-431501, (MS) India*

## Formulae S1

All potentials mentioned in this work measured versus Hg/HgO as a saturated calomel electrode (SCE) and converted in to a reversible hydrogen electrode (RHE) scale according to Nernst equation without iR-correction. Equation for conversion of potential as

$$E_{RHE} = E_{SCE} + 0.059 \times pH + E^0_{SCE} \quad (1)$$

where,  $E_{RHE}$ ,  $E_{SCE}$ , and  $E^0_{SCE}$  are potential versus RHE, potential vs. SCE, and standard redox potential of SCE at 298 K.

The overpotential ( $\eta$ ) at a current density of the prepared samples were calculated from linear sweep voltammetry (LSV) curves using following equation,

$$\eta = E_{RHE} - 1.23 \text{ V} \quad (2)$$

and Tafel slopes (b) were calculated by fitting linear portion of Tafel plot with Tafel equation as,

$$\eta = b \log j + a - 1.23 \text{ V} \quad (3)$$

where, ' $\eta$ ', ' $j$ ' and ' $a$ ' are overpotential, current density and fitting parameter, respectively.

## Reaction mechanism

The formation of NiF<sub>2</sub>@Ni NAs in a 1:50 mL (v/v) HF solution in ethanol occurs as follows under hydrothermal conditions. When ethanolic HF solution is hydrothermally heated it produces ethoxy and fluoride ion radicals and protons. At the same time, Ni foam in the solution oxidizes to provide nickel ions and electrons in to solution reduce fluoride ion to nucleate on the Ni foam surface as shown in Scheme S1. In this reaction, hydrothermal displacement occurs between Ni and F, causing deposition of NiF<sub>2</sub>@Ni.

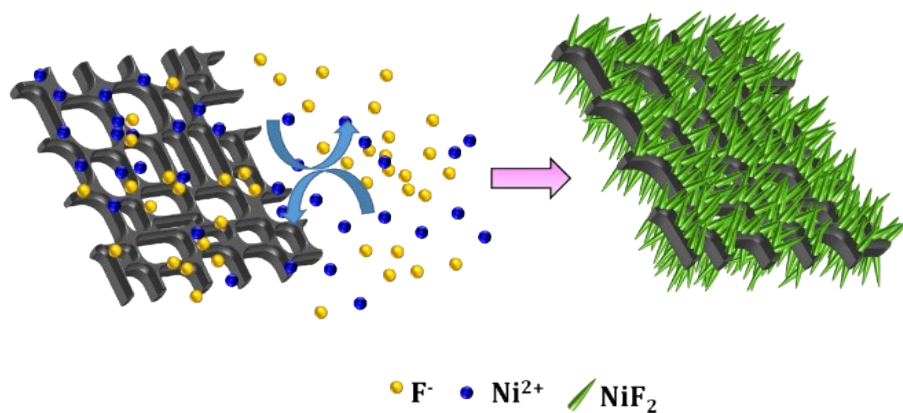

**Scheme S1.** Schematic of the possible growth mechanism of the NiF<sub>2</sub>@Ni nanorods during hydrothermal method. The black 3D network represents the Ni-foam surface, blue and yellow spheres are Ni<sup>2+</sup> and F<sup>-</sup> ions and on the right hand side we show a schematic sketch of the nanorod array (NA) of NiF<sub>2</sub>.

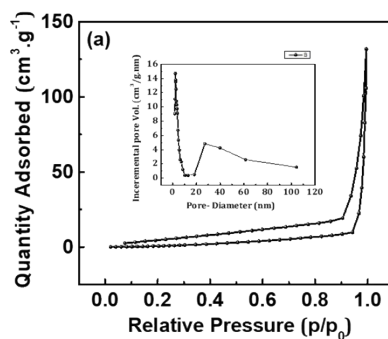

**Figure S1.** BET measurements (inset shows pore size distribution).

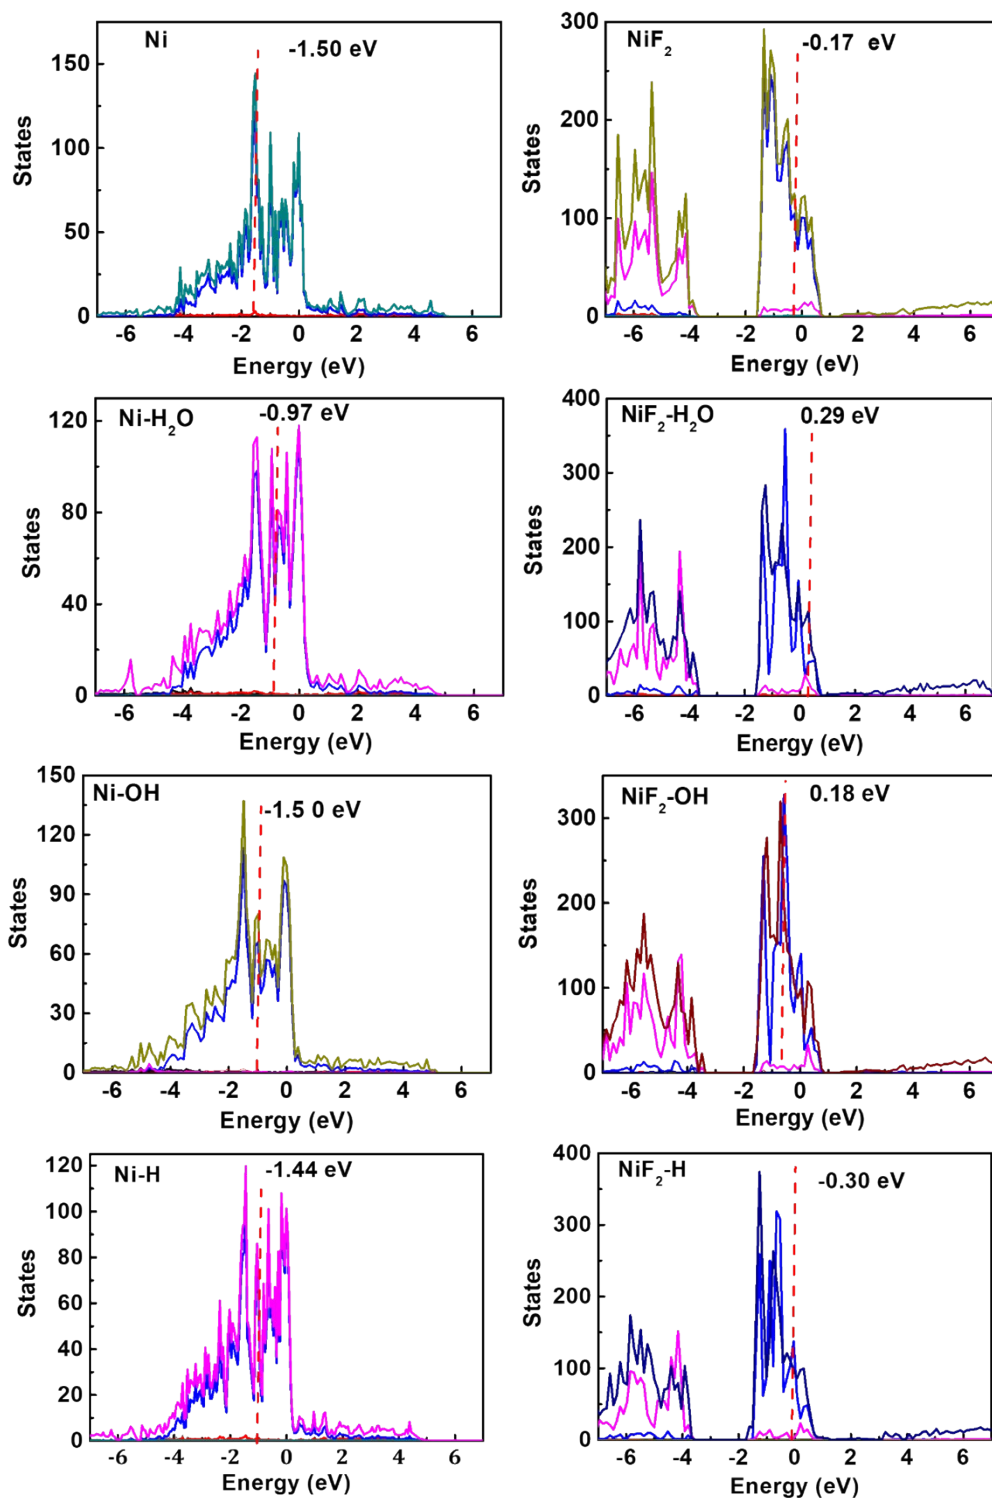

**Figure S2.** Comparison of total density of states (DOS) and projected DOS on to different atomic orbital's for Ni (111) and NiF<sub>2</sub> (110) surfaces following adsorption of H<sub>2</sub>O, OH and H.

The Fermi level has been indicated with dashed line. Color codes: Ni= black- Ni-S, red- Ni-P, blue-Ni-D and dark cyan- total, NiF<sub>2</sub>= black- Ni-S, red- Ni-P, blue-Ni-D and dark cyan- F-S, magenta-F-P, dark yellow-total, Ni-H<sub>2</sub>O= black- Ni-S, red- Ni-P, blue-Ni-D, dark cyan- O-S, magenta-total, NiF<sub>2</sub>-H<sub>2</sub>O = black- Ni-S, red- Ni-P, blue-Ni-D, dark cyan- F-S, magenta-F-T, dark yellow-O-S, navy-total, Ni-OH= black-Ni-S, red-Ni-P, blue-Ni-D, dark cyan-O-S, magenta-O-P, dark yellow-total, NiF<sub>2</sub>-OH= black-Ni-S, red-Ni-P, blue-Ni-D, dark cyan-F-S, magenta-F-P, dark yellow-O-S, navy-O-P, wine-total, Ni-H= black-Ni-S, red-Ni-P, blue-Ni-D, dark cyan-H-S, magenta-total, NiF<sub>2</sub>-H = black-Ni-S, red-Ni-P, blue-Ni-D, dark cyan-F-S, magenta-F-P, dark yellow-H-S, navy-total.
